# Supplementary material for: Zn–CxNynanoparticle arrays derived from a metal–organic framework for ultralow-voltage hysteresis and stable Li metal anodes
Source: Royal Society of Chemistry journal article supplement (doi:10.1039/d1ta09070d), 2021-01-01
Supplement: d1ta09070d1.pdf [file d1ta09070d1.pdf]

## Supporting Information

Zn-C<sub>x</sub>N<sub>y</sub> nanoparticle arrays derived from metal-organic  
framework for ultralow-voltage hysteresis and stable Li metal  
anodes

Zilong Zhuang,<sup>a</sup> Chang Liu,<sup>a</sup> Yiyang Yan,<sup>a</sup> Pengcheng Ma,<sup>b</sup> and Daniel Q. Tan<sup>a,\*</sup>

<sup>a</sup>Guangdong Technion Israel Institute of Technology, Shantou, 515063, China.

<sup>b</sup>China Machinery International Engineering Design & Research Institute Co., Ltd,  
Changsha, 410021, China.

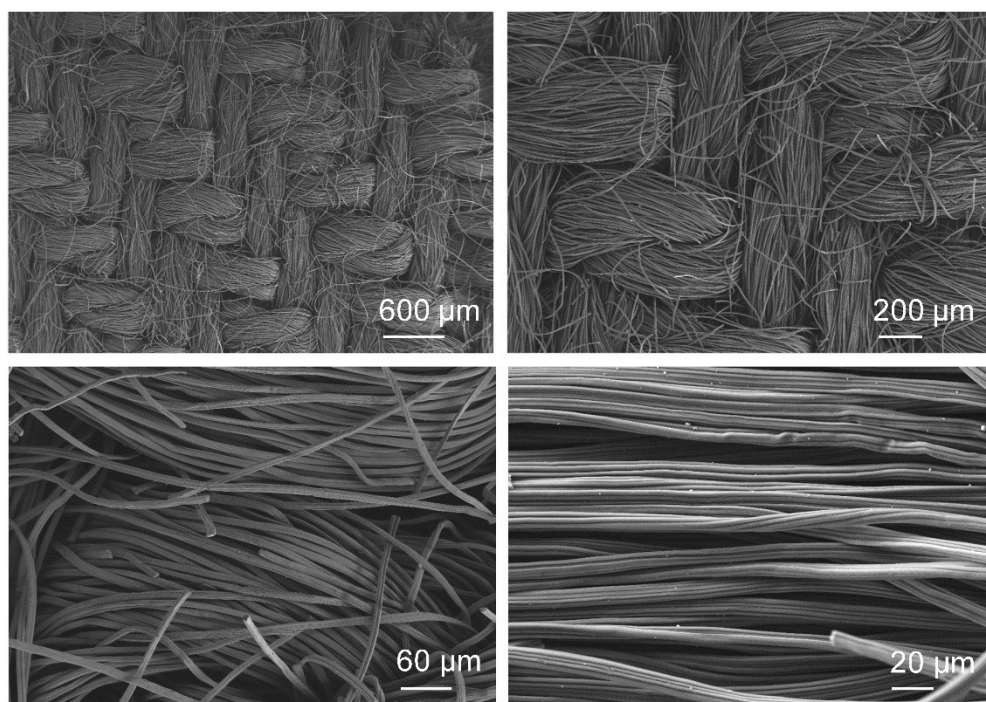

Fig. S1 SEM images of commercial carbon cloth (CC).

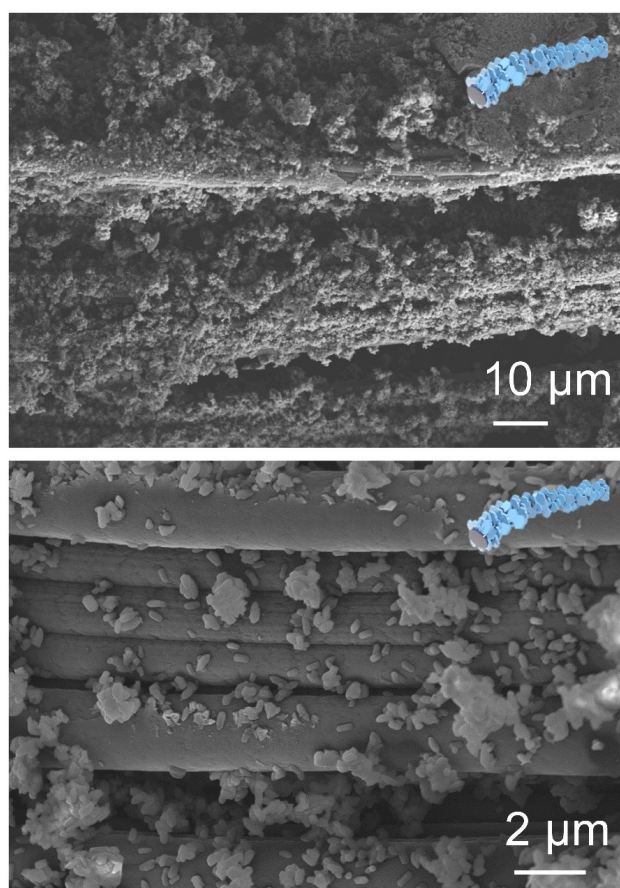

Fig. S2 SEM images of ZIF-8-CC, insets are the schematic figure of ZIF-8-CC.

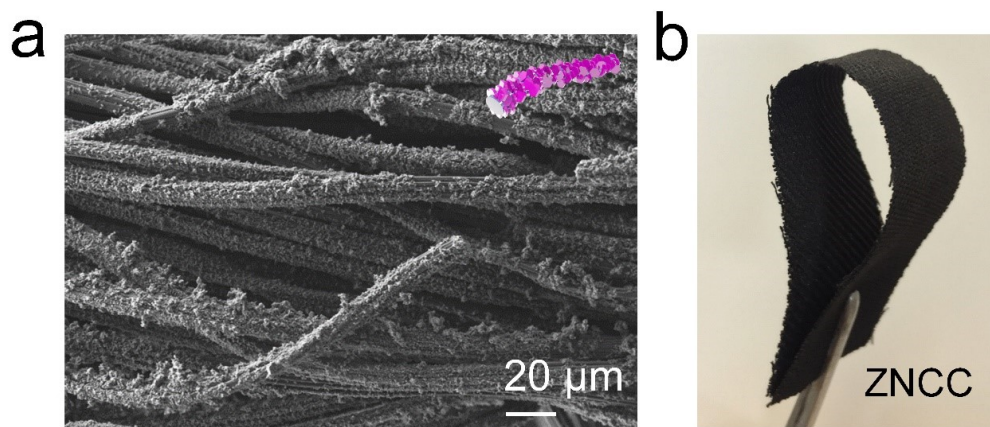

Fig. S3 (a) SEM image of ZNCC, inset is the schematic figure of ZIF-8-CC. (b) Photograph of ZNCC, demonstrates its good flexibility.

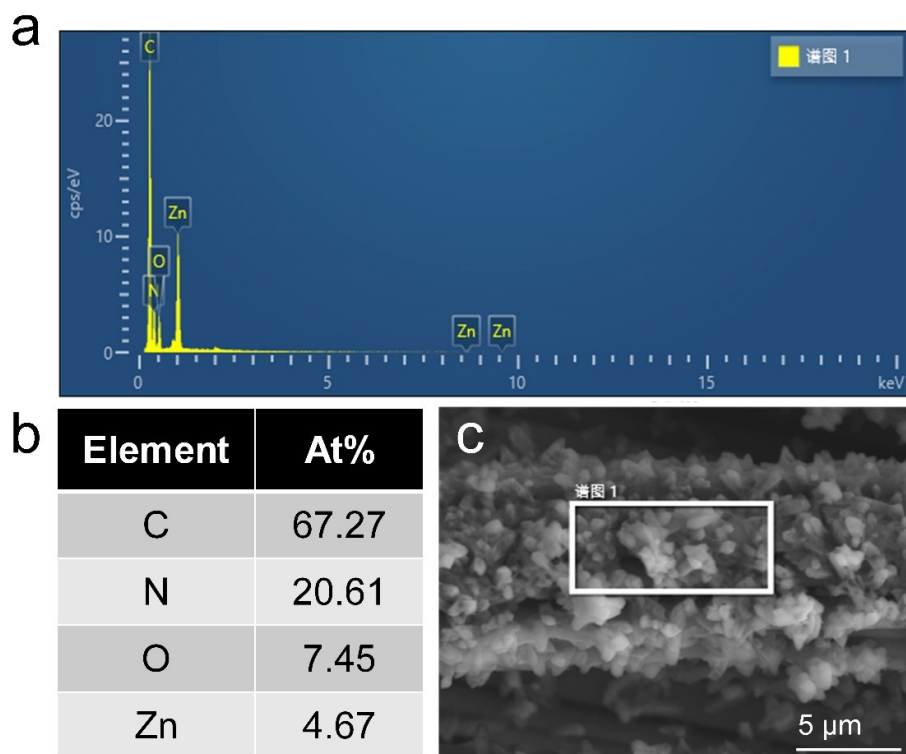

Fig. S4 (a) EDS spectrum of ZNCC. (b) Elements content and (c) SEM image of EDS test area.

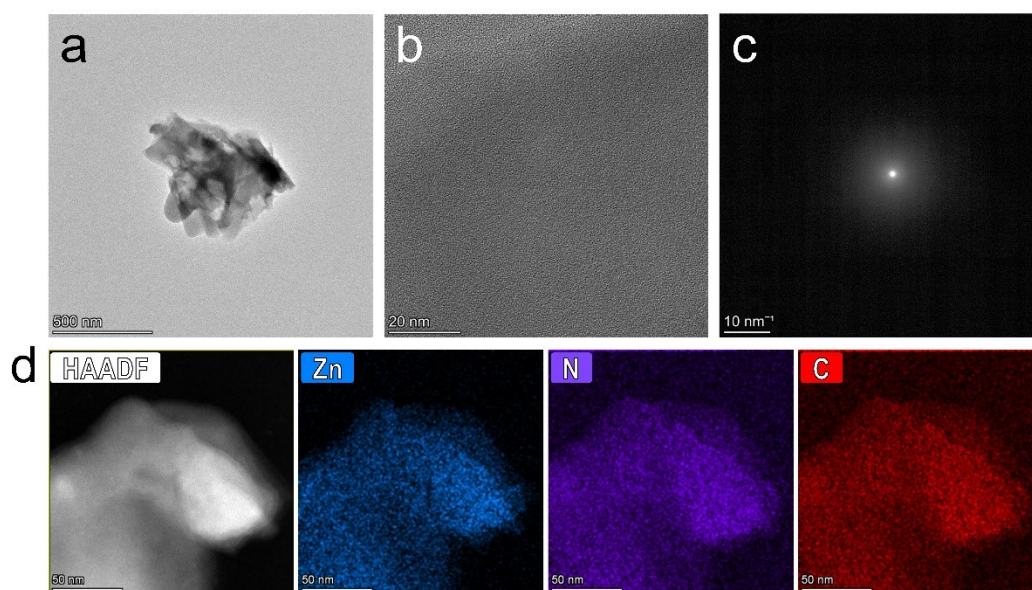

Fig. S5 (a,b) TEM images of ZNCC. (c) Selected area electron diffraction (SAED) pattern of ZNCC, demonstrates the C and Zn is amorphous state. (d) HAADF STEM image and EDS mapping of ZNCC.

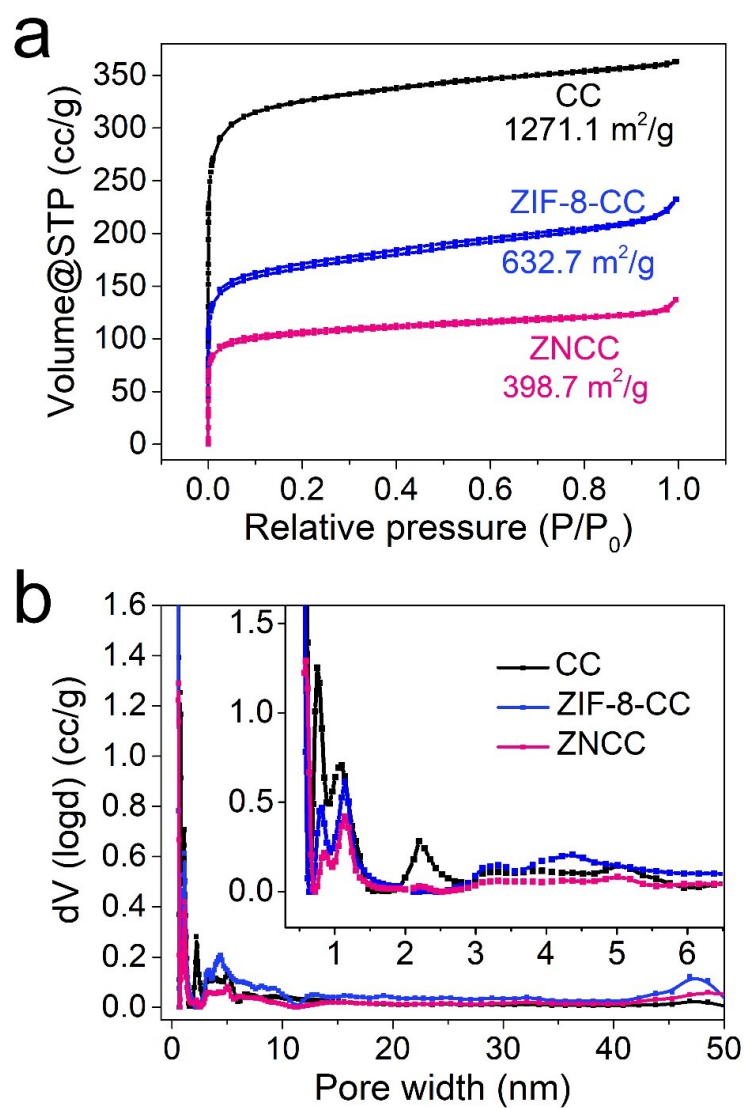

Fig. S6 (a) Dinitrogen absorption-desorption isothermal curve. (b) Pore size distributions from micropores to mesopores of CC, ZIF-8-CC and ZNCC.



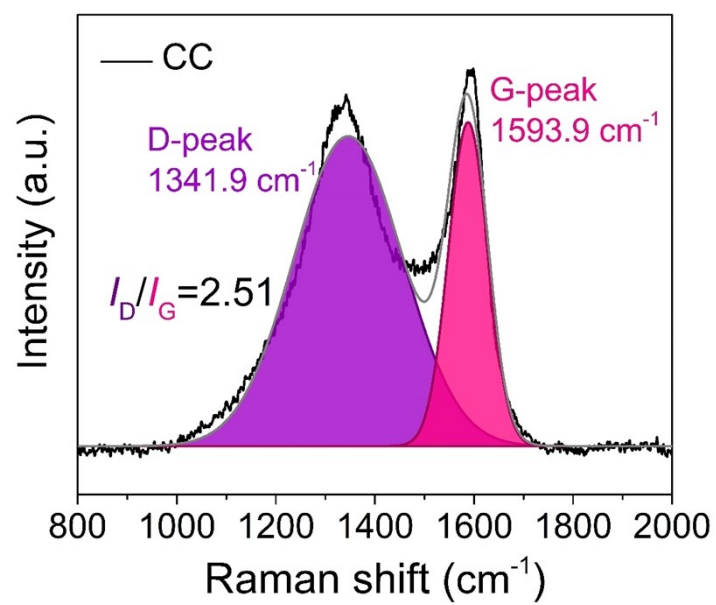

Fig. S7 Raman spectra of CC.



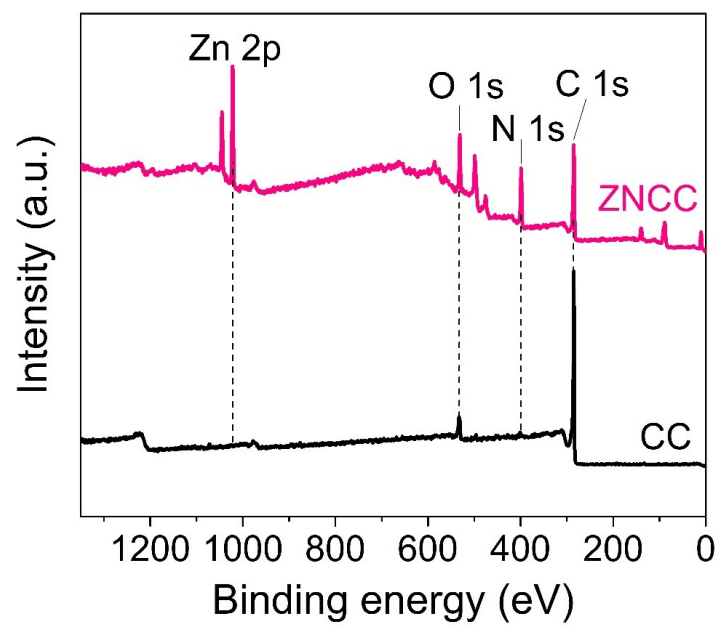

Fig. S8 XPS survey spectra of ZNCC and CC.

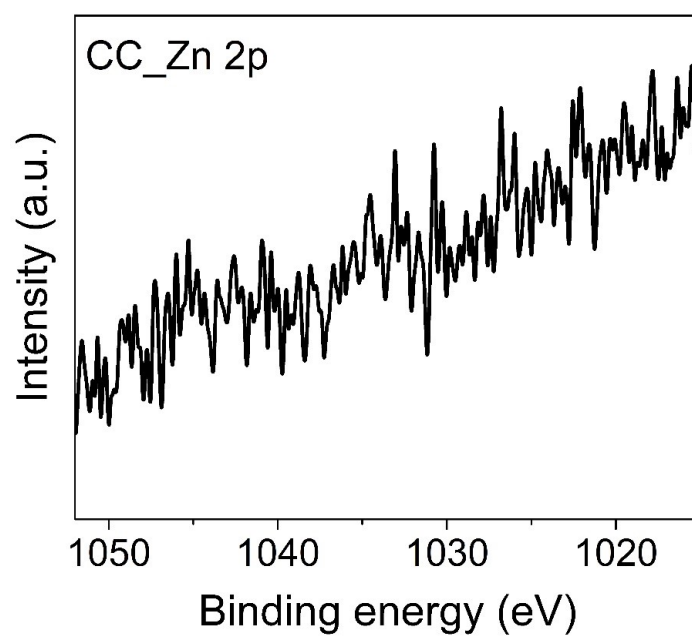

Fig. S9 Zn 2p XPS spectra of CC.

**a**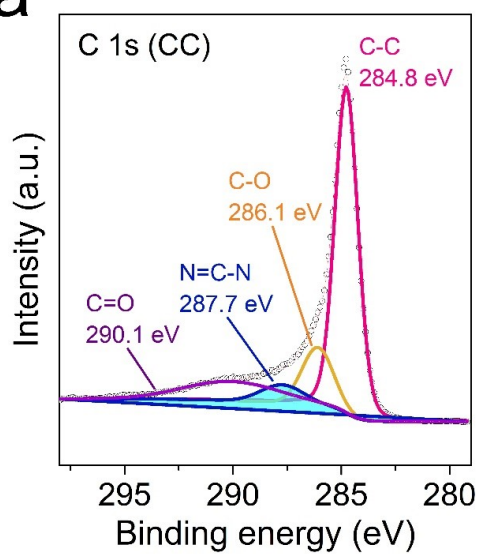**b**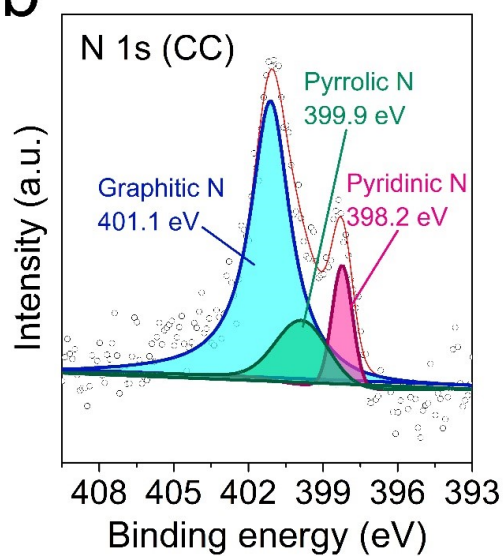

Fig. S10 (a) C 1s and (b) N 1s XPS spectra of CC.

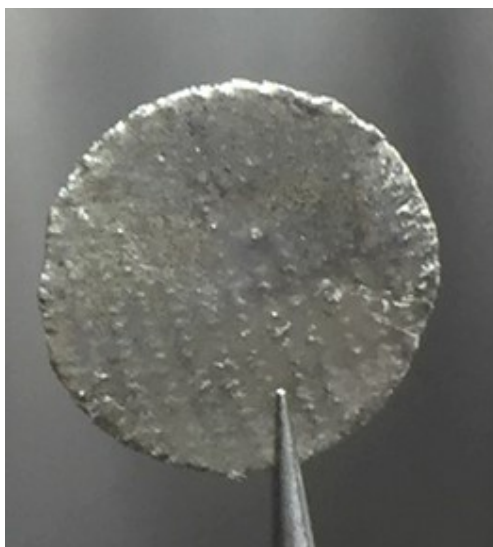

Fig. S11 Photograph of ZnCC-Li.

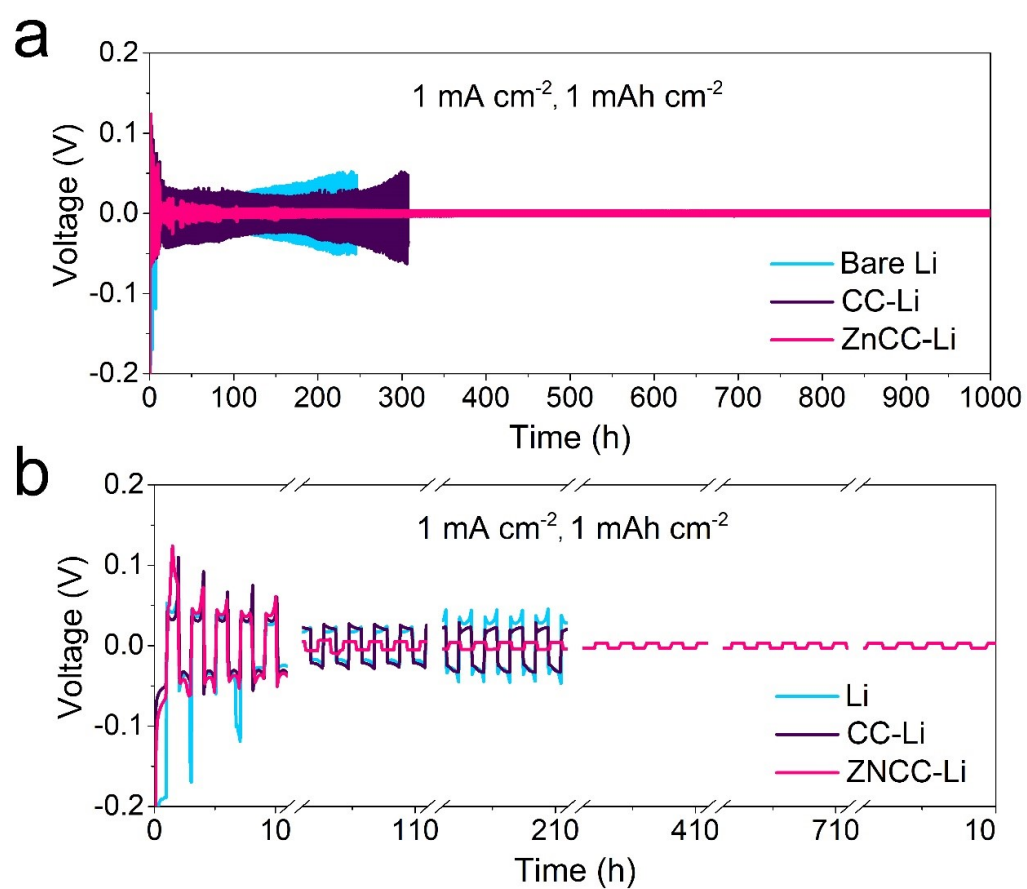

Fig. S12 (a) Voltage profiles of bare-Li, CC-Li and ZNCC-Li. (b) Enlarged voltage profiles at different cycles with a cycling capacity of  $1 \text{ mA cm}^{-2}$  to  $1 \text{ mAh cm}^{-2}$ .

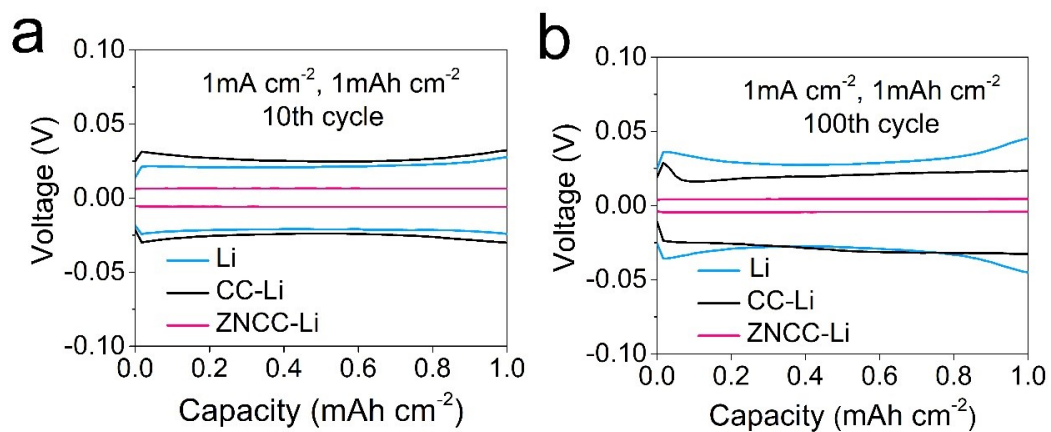

Fig. S13 Voltage profiles of bare-Li, CC-Li and ZNCC-Li at (a) 10<sup>th</sup> and (b) 100<sup>th</sup> cycle with a cycling capacity of 1 mA cm<sup>-2</sup> to 1 mAh cm<sup>-2</sup>.

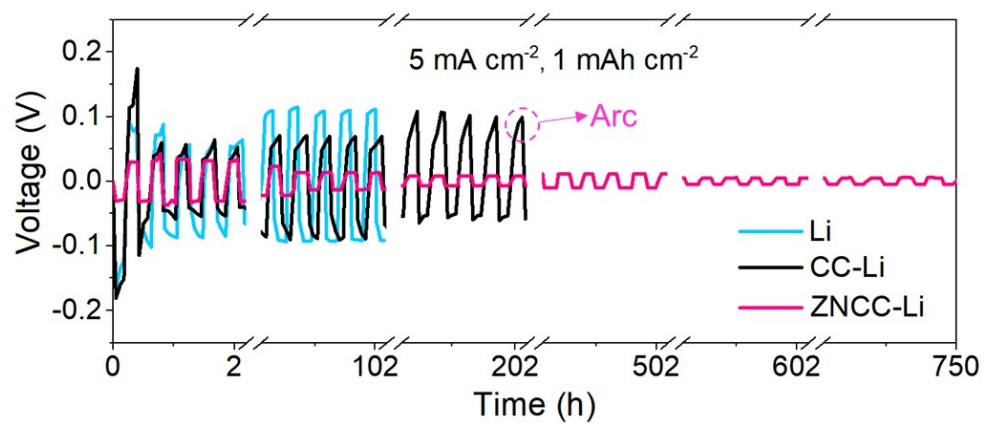

Fig. S14 Voltage profiles of bare-Li, CC-Li and ZNCC-Li at different cycle with a cycling capacity of 5 mA cm<sup>-2</sup> to 1 mAh cm<sup>-2</sup>.



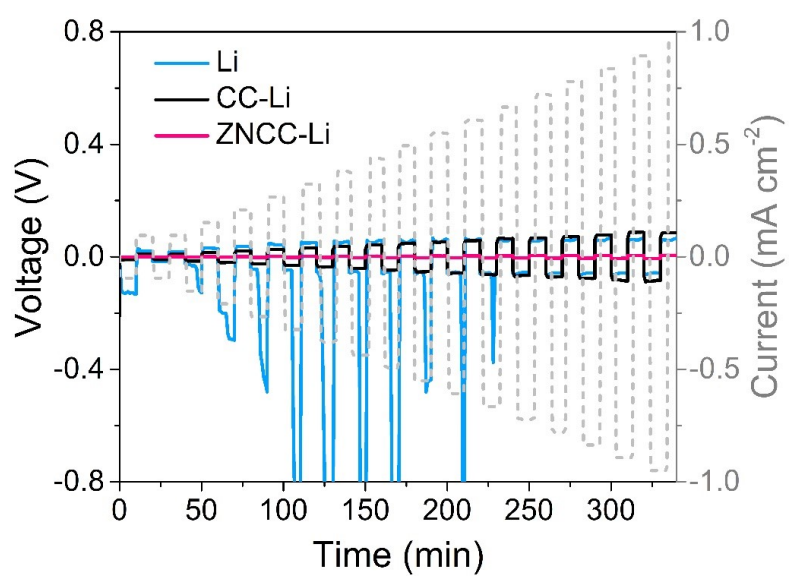

Fig. S15 Voltage profiles of Li, CC-Li and ZNCC-Li at gradual increased current density.

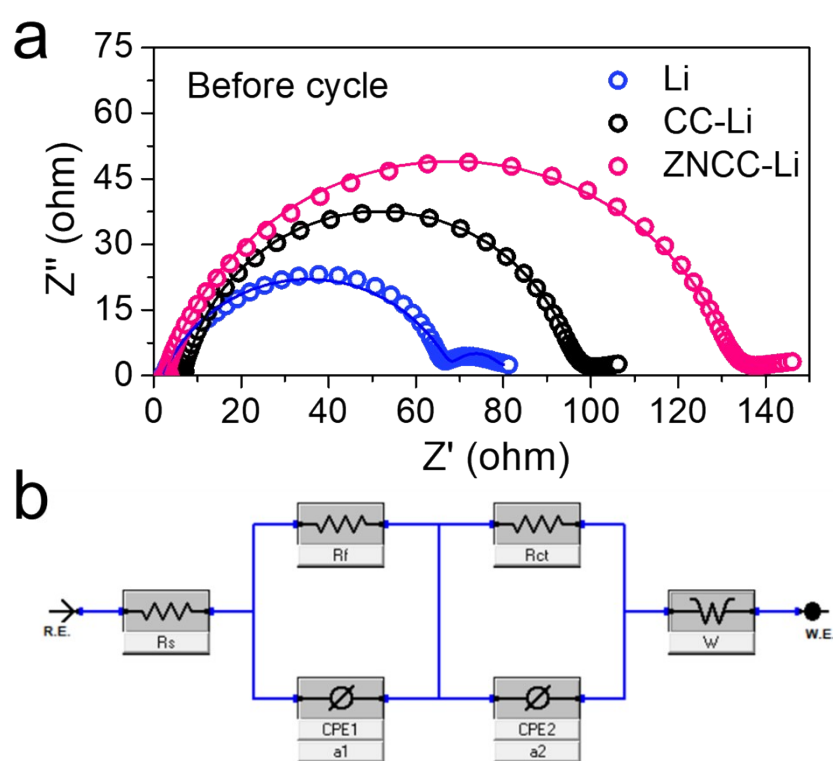

Fig. S16 (a) EIS spectra before cycling at gradual increased current density. (b)

Equivalent circuit used to fit the impedance data.

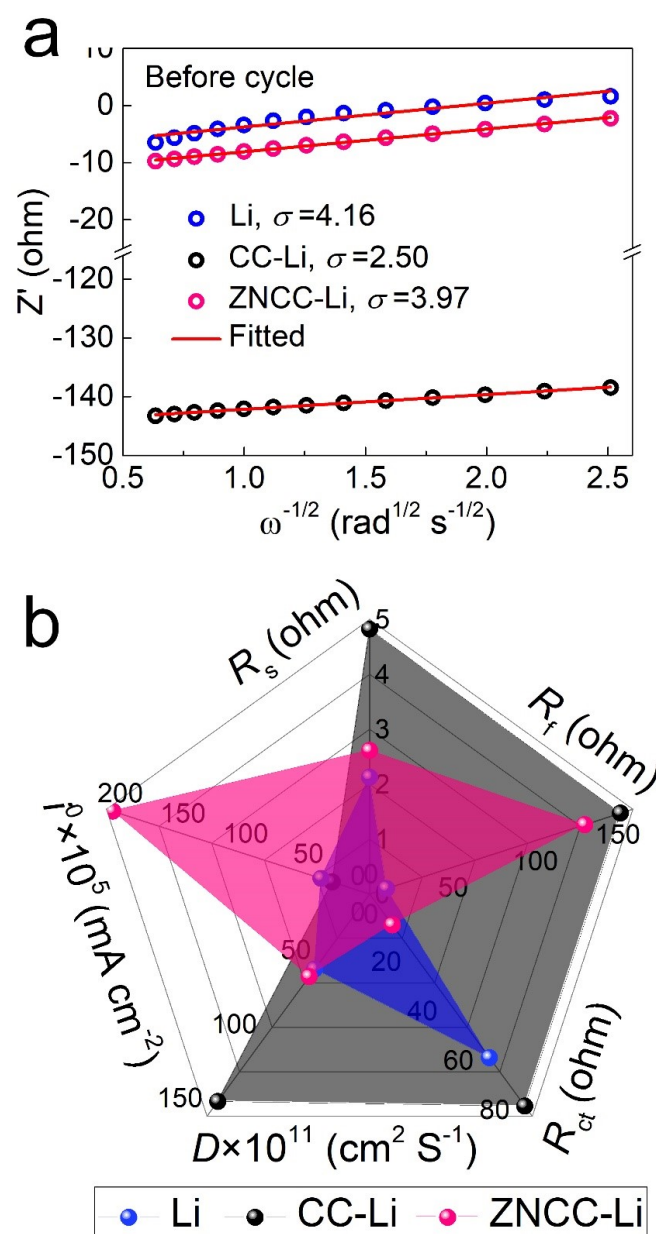

Fig. S17 (a) Calculation of Warburg factor  $\sigma$  before cycling at gradual increased current density. (b) Radar figure of fitted electrochemical parameters of Li, CC-Li and ZNCC-Li.

Table S1 Electrochemical parameters calculated from EIS spectra before cycling at gradual increased current density.

| Sample  | $R_s (\Omega)$ | $R_f (\Omega)$ | $R_{ct} (\Omega)$ | $\sigma (\Omega \text{ cm}^2 \text{ s}^{1/2})$ | $D (\text{cm}^2 \text{ S}^{-1})$ | $i^0 (\text{mA cm}^{-2})$ |
|---------|----------------|----------------|-------------------|------------------------------------------------|----------------------------------|---------------------------|
| Li      | 2.126          | 10.28          | 66.27             | 4.16                                           | $5.07 \times 10^{-10}$           | $3.88 \times 10^{-4}$     |
| CC-Li   | 4.825          | 152.5          | 85.85             | 2.50                                           | $1.40 \times 10^{-9}$            | $2.99 \times 10^{-4}$     |
| ZNCC-Li | 2.613          | 130.8          | 12.51             | 3.97                                           | $5.57 \times 10^{-10}$           | $2.05 \times 10^{-3}$     |

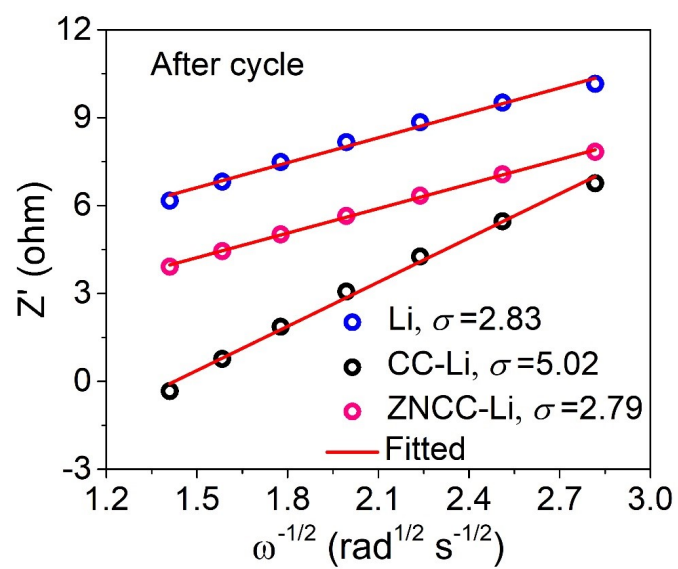

Fig. S18 Calculation of Warburg factor  $\sigma$  after cycling at gradual increased current density.

Table S2 Electrochemical parameters calculated from EIS spectra after cycling at  
gradual increased current density.

| Sample  | $R_s (\Omega)$ | $R_f (\Omega)$ | $R_{ct} (\Omega)$ | $\sigma (\Omega \text{ cm}^2 \text{ s}^{1/2})$ | $D (\text{cm}^2 \text{ S}^{-1})$ | $i^0 (\text{mA cm}^{-2})$ |
|---------|----------------|----------------|-------------------|------------------------------------------------|----------------------------------|---------------------------|
| Li      | 1.881          | 6.292          | 43.72             | 2.83                                           | $1.10 \times 10^{-9}$            | $5.88 \times 10^{-4}$     |
| CC-Li   | 1.901          | 9.545          | 91.99             | 5.02                                           | $3.48 \times 10^{-10}$           | $2.79 \times 10^{-4}$     |
| ZNCC-Li | 2.814          | 17.03          | 29.30             | 2.79                                           | $1.13 \times 10^{-9}$            | $8.77 \times 10^{-4}$     |

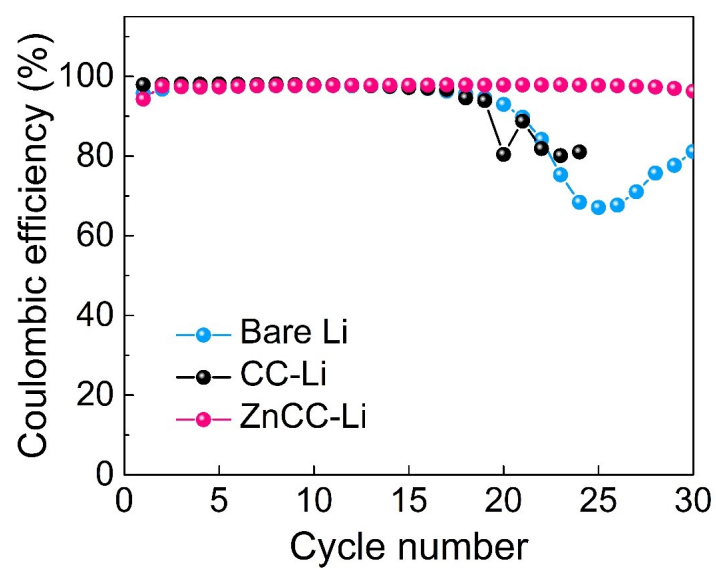

Fig. S19 Coulombic efficiency of Li, CC-Li and ZNCC-Li obtained from Li-Cu cells.



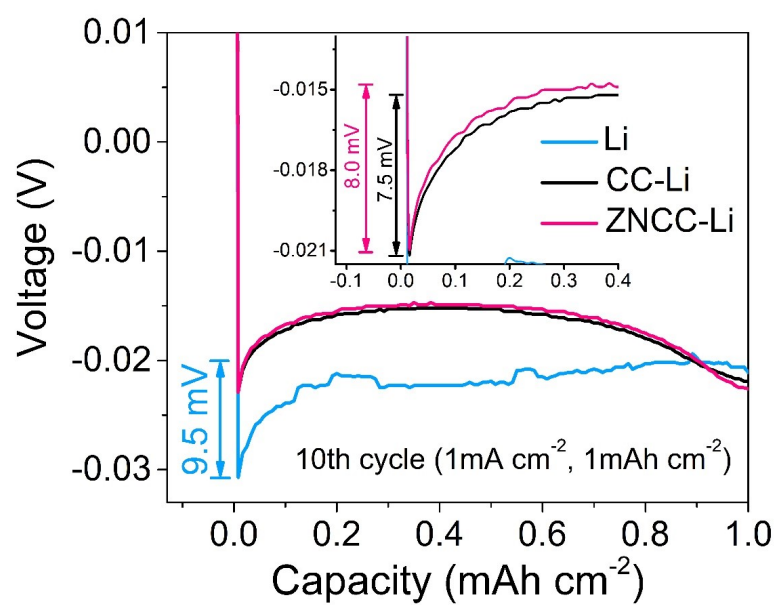

Fig. S20 Voltage profiles of Li-Cu cells during Li nucleation at 10th cycle of bare-Li, CC-Li and ZNCC-Li at 0.5 mA cm<sup>-2</sup> to 1 mAh cm<sup>-2</sup>.

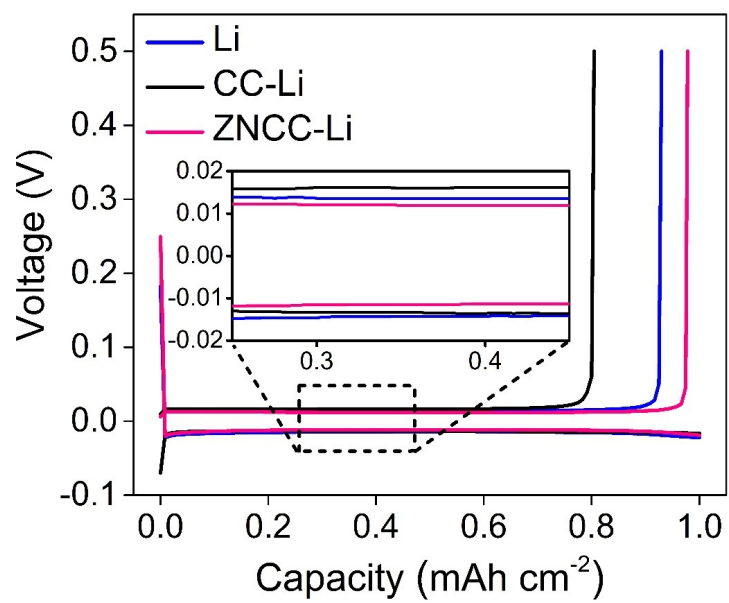

Fig. S21 Charge-discharge profiles of Li-Cu cells at 20th cycle with 0.5 mA cm<sup>-2</sup> for a total 1 mAh cm<sup>-2</sup>. ZNCC-Li shows smallest voltage hysteresis.

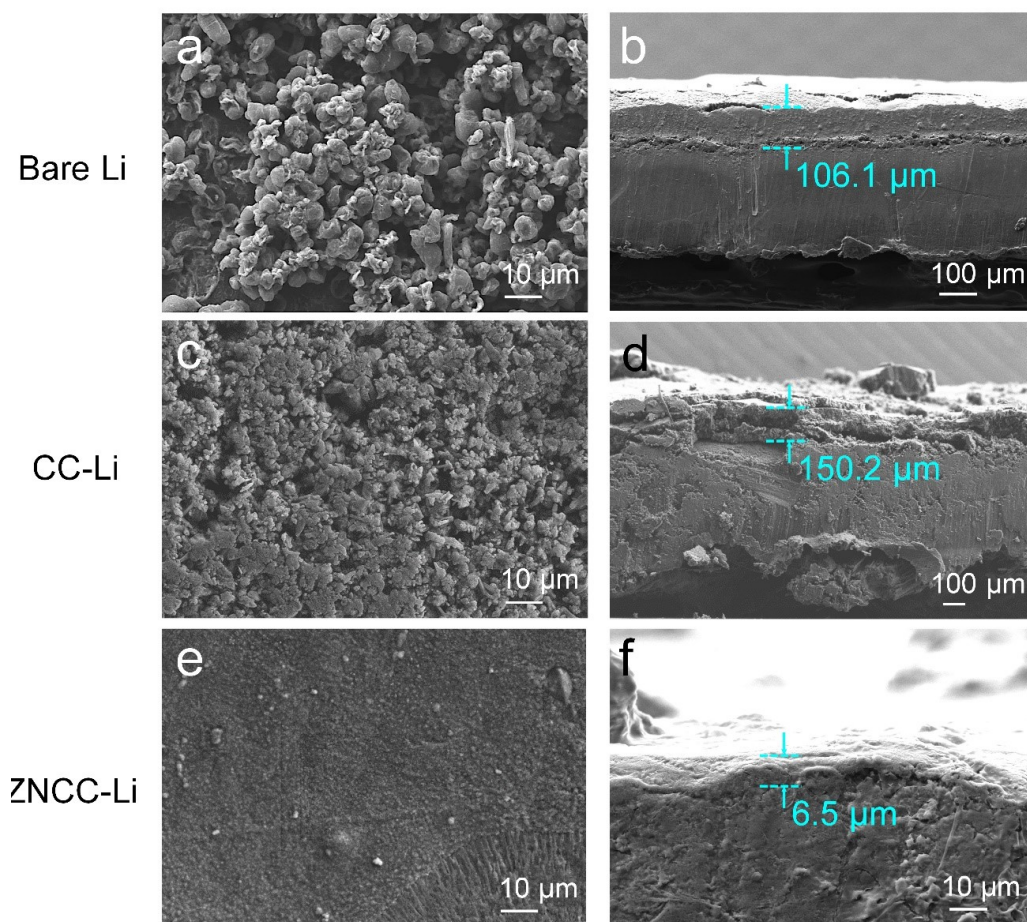

Fig. S22 Top side (a, c, e) and cross-section (b, d, f) SEM images of Li anodes after 500 cycles at  $5 \text{ mA cm}^{-2}$  to  $1 \text{ mAh cm}^{-2}$ .

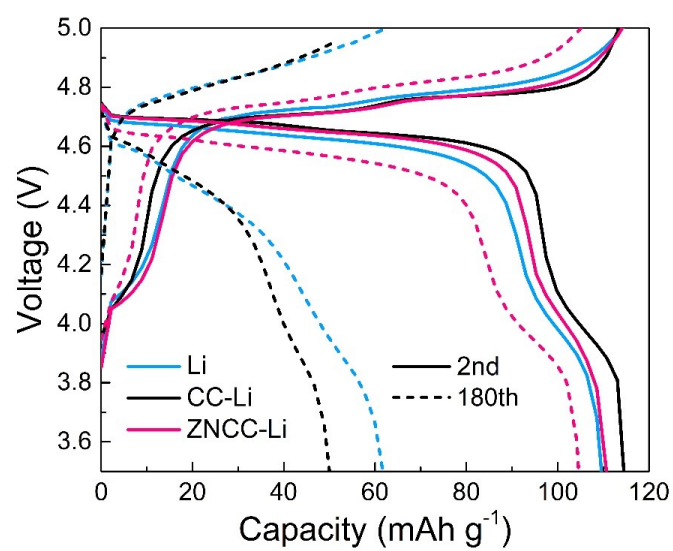

Fig. S23 Voltage profiles of Li, CC-Li and ZNCC-Li at 2nd and 180th cycle.

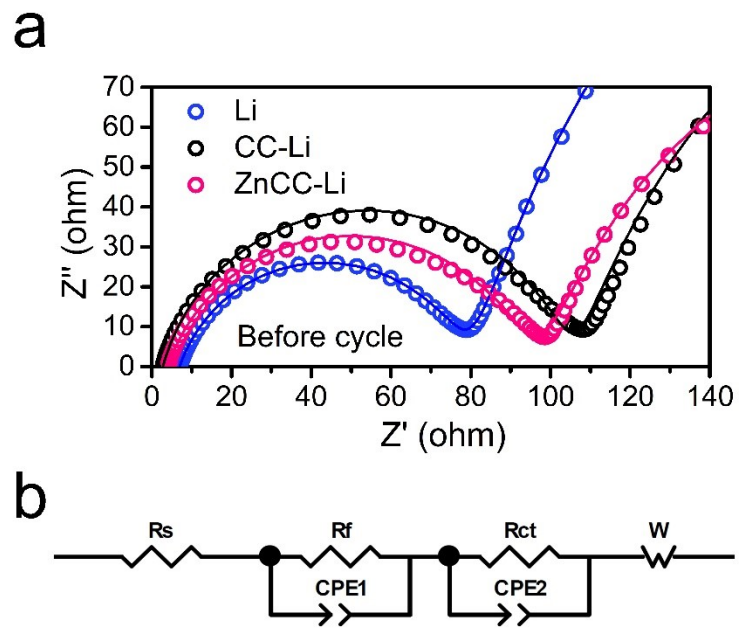

Fig. S24 (a) EIS spectra of full cells before cycling. (b) Equivalent circuit used to fit the impedance data.

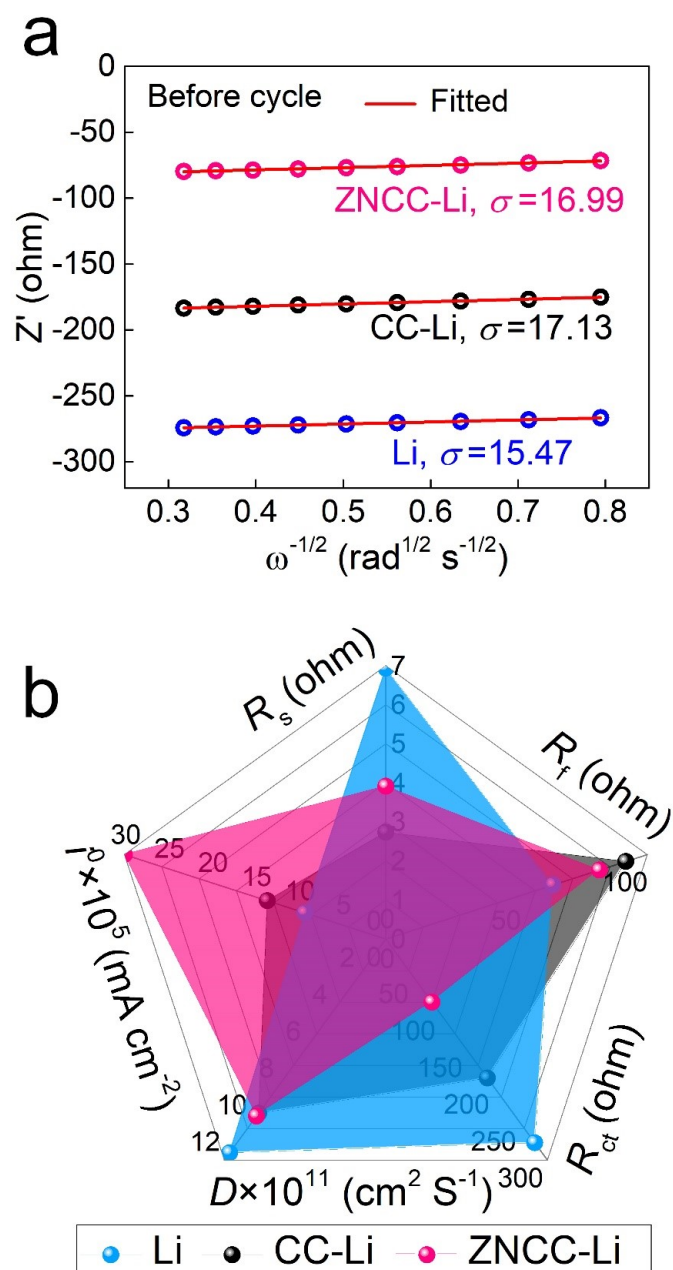

Fig. S25 (a) Calculation of Warburg factor  $\sigma$  of full cells before cycling. (b) Radar figure of fitted electrochemical parameters of Li, CC-Li and ZNCC-Li.

Table S3 Electrochemical parameters calculated from EIS spectra before cycling.

| Sample  | $R_s (\Omega)$ | $R_f (\Omega)$ | $R_{ct} (\Omega)$ | $\sigma (\Omega \text{ cm}^2 \text{ s}^{1/2})$ | $D (\text{cm}^2 \text{ S}^{-1})$ | $i^0 (\text{mA cm}^{-2})$ |
|---------|----------------|----------------|-------------------|------------------------------------------------|----------------------------------|---------------------------|
| Li      | 6.937          | 70.35          | 276.5             | 15.47                                          | $1.16 \times 10^{-10}$           | $9.29 \times 10^{-5}$     |
| CC-Li   | 2.735          | 101.0          | 188.7             | 17.13                                          | $9.45 \times 10^{-11}$           | $1.36 \times 10^{-4}$     |
| ZNCC-Li | 3.914          | 89.93          | 85.71             | 16.99                                          | $9.61 \times 10^{-11}$           | $3.00 \times 10^{-4}$     |



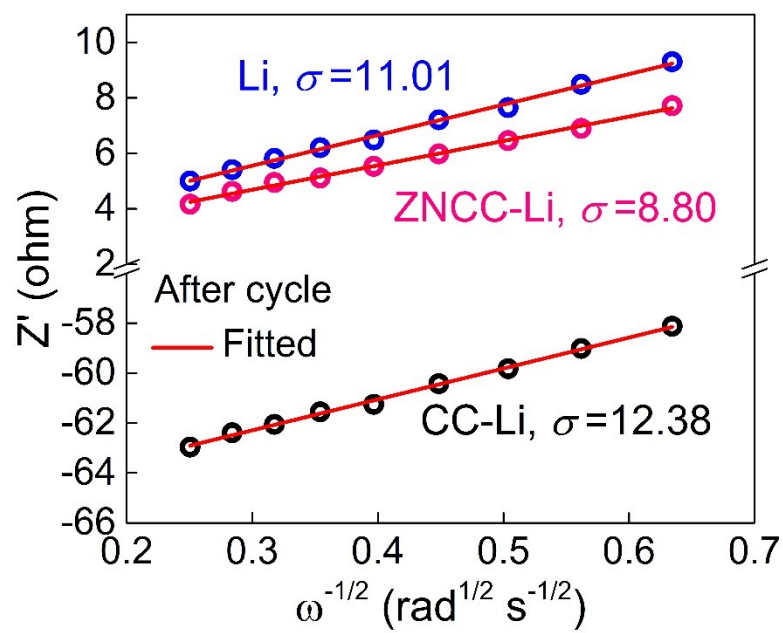

Fig. S26 Calculation of Warburg factor  $\sigma$  of full cells after 180 cycles at 1 C (1 C=133 mAh g<sup>-1</sup>).

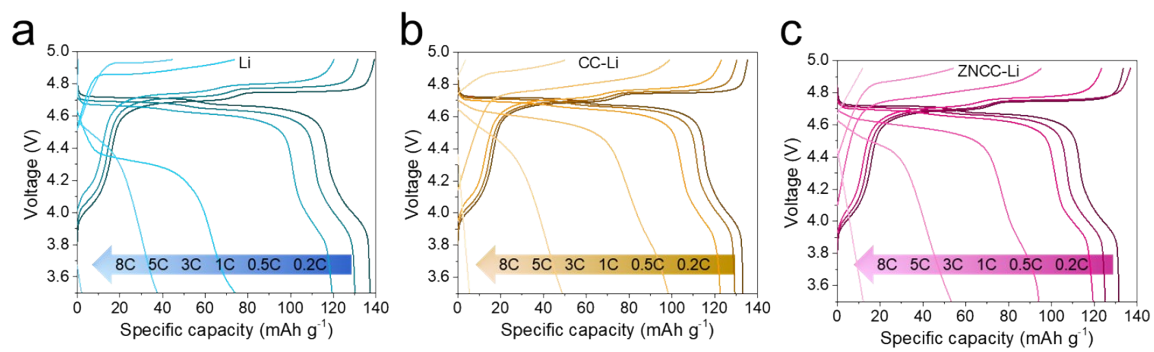

Fig.S27 The charge/discharge curves at different current rates.

Table S4 Electrochemical parameters of full cells calculated from EIS spectra after 180 cycles at 1 C (1 C=133 mAh g<sup>-1</sup>).

| Sample  | $R_s (\Omega)$        | $R_f (\Omega)$ | $R_{ct} (\Omega)$ | $\sigma (\Omega \text{ cm}^2 \text{ s}^{1/2})$ | $D (\text{cm}^2 \text{ S}^{-1})$ | $i^0 (\text{mA cm}^{-2})$ |
|---------|-----------------------|----------------|-------------------|------------------------------------------------|----------------------------------|---------------------------|
| Li      | 2.503                 | 12.51          | 9.424             | 11.01                                          | $2.29 \times 10^{-10}$           | $2.73 \times 10^{-3}$     |
| CC-Li   | 2.226                 | 37.08          | 58.45             | 12.38                                          | $1.81 \times 10^{-10}$           | $4.40 \times 10^{-4}$     |
| ZNCC-Li | $2.67 \times 10^{-3}$ | 10.93          | 7.727             | 8.80                                           | $3.58 \times 10^{-10}$           | $3.32 \times 10^{-3}$     |

Table S5 Li symmetric cells' cycle performance comparison of recently published works of Li metal anode with a host and this work.

| Host                                       | Cycle time (h) | Voltage hysteresis (mV) | Current density (mA cm <sup>-2</sup> ) | Areal capacity (mAh cm <sup>-2</sup> ) | Ref.             |
|--------------------------------------------|----------------|-------------------------|----------------------------------------|----------------------------------------|------------------|
| NPCC                                       | 600            | 30                      | 3                                      | 1                                      | 1                |
| g-C <sub>3</sub> N <sub>4</sub> @Ni foam   | 900            | 15                      | 1                                      | 9                                      | 2                |
| MG                                         | 400            | 25                      | 5                                      | 1                                      | 3                |
| CCOF                                       | 1000           | 16                      | 1                                      | 1                                      | 4                |
| NiF <sub>x</sub> @NF                       | 1300           | ~20                     | 1                                      | 1                                      | 5                |
| V <sub>2</sub> O <sub>5</sub> -NF          | 1600           | ~18                     | 1                                      | 1                                      | 6                |
| CCZF                                       | 900            | ~30                     | 1                                      | 1                                      | 7                |
| Co@N-G                                     | 1000           | 30                      | 1                                      | 1                                      | 8                |
| CC@CN-Co                                   | 800            | 20                      | 2                                      | 1                                      | 9                |
| MC@HCNFs                                   | 500            | ~68                     | 2                                      | 1                                      | 10               |
| NRA-CC                                     | 1200           | ~20                     | 1                                      | 1                                      | 11               |
| AuLi <sub>3</sub> @Ni foam                 | 740            | ~12                     | 0.5                                    | 1                                      | 12               |
| CFC/Co-NC                                  | 100            | 46                      | 5                                      | 1                                      | 13               |
| Zn/Cu <sub>0.7</sub> Zn <sub>0.3</sub> /CF | 1200           | 6                       | 2.5                                    | 1.5                                    | 14               |
| <b>ZNCC</b>                                | <b>2300</b>    | <b>6.4</b>              | <b>10</b>                              | <b>1</b>                               | <b>This work</b> |

## References

1. K. Li, Z. Hu, J. Ma, S. Chen, D. Mu and J. Zhang, *Adv. Mater.*, 2019, **31**, e1902399.
2. Z. Lu, Q. Liang, B. Wang, Y. Tao, Y. Zhao, W. Lv, D. Liu, C. Zhang, Z. Weng, J. Liang, H. Li and Q.-H. Yang, *Adv. Energy Mater.*, 2019, **9**, 1803186.
3. H. Shi, C. J. Zhang, P. Lu, Y. Dong, P. Wen and Z. S. Wu, *ACS Nano*, 2019, **13**, 14308-14318.
4. X.-Y. Yue, W.-W. Wang, Q.-C. Wang, J.-K. Meng, X.-X. Wang, Y. Song, Z.-W. Fu, X.-J. Wu and Y.-N. Zhou, *Energy Stor. Mater.*, 2019, **21**, 180-189.
5. G. Huang, S. Chen, P. Guo, R. Tao, K. Jie, B. Liu, X. Zhang, J. Liang and Y.-C. Cao, *Chem. Eng. J.*, 2020, **395**, 125122.
6. G. Huang, P. Guo, J. Wang, S. Chen, J. Liang, R. Tao, S. Tang, X. Zhang, S. Cheng, Y.-C. Cao and S. Dai, *Chem. Eng. J.*, 2020, **384**, 123313.
7. Y. Li, Y. Wang, Y. Shi, H. Wu, J. Zeng, H. Bu, M. Zhu, C. Xiao, Y. Zhang, G. Gao and S. Ding, *Science Bulletin*, 2020, **65**, 1094-1102.
8. T. S. Wang, X. Liu, X. Zhao, P. He, C. W. Nan and L. Z. Fan, *Adv. Funct. Mater.*, 2020, **30**, 2000786.
9. T. Zhou, J. Shen, Z. Wang, J. Liu, R. Hu, L. Ouyang, Y. Feng, H. Liu, Y. Yu and M. Zhu, *Adv. Funct. Mater.*, 2020, **30**, 1909159.
10. X. Song, H. Wang, H. Wu, J. Zou, F. Zhao, H. Wu and X. Zeng, *Appl. Surf. Sci.*, 2021, **565**, 150589.
11. T. S. Wang, X. Liu, Y. Wang and L. Z. Fan, *Adv. Funct. Mater.*, 2020, **31**, 2001973.
12. X. Ke, Y. Liang, L. Ou, H. Liu, Y. Chen, W. Wu, Y. Cheng, Z. Guo, Y. Lai, P. Liu and Z. Shi, *Energy Stor. Mater.*, 2019, **23**, 547-555.
13. G. Jiang, N. Jiang, N. Zheng, X. Chen, J. Mao, G. Ding, Y. Li, F. Sun and Y. Li, *Energy Stor. Mater.*, 2019, **23**, 181-189.
14. Y. Cheng, X. Ke, Y. Chen, X. Huang, Z. Shi and Z. Guo, *Nano Energy*, 2019, **63**, 103854.
